# Supplementary material for: Flexible multi-color electroluminescent devices with a high transmission conducting hydrogel and an organic dielectric
Source: Royal Society of Chemistry journal article supplement (doi:10.1039/d3nr01177a), 2023-01-01
Supplement: d3nr01177a1.pdf [file d3nr01177a1.pdf]

**Supporting information for**

**Flexible multi-color electroluminescent devices  
with high transmission conducting hydrogel and  
organic dielectric**

Yongjie Yu,<sup>1</sup> Kun He,<sup>2</sup> Haibo Xu,<sup>1</sup> Zhen Xiao,<sup>1\*</sup> Liang Chen,<sup>1</sup> Shiqing  
Xu,<sup>1</sup> Gongxun Bai<sup>1\*</sup>

<sup>1</sup> Key Laboratory of Rare Earth Optoelectronic Materials and Devices of  
Zhejiang Province, College of Optical and Electronic Technology, China  
Jiliang University, Hangzhou 310018, China

<sup>2</sup> National Laboratory of Solid State Microstructures, School of Electronic  
Science and Engineering and Collaborative Innovation Center of  
Advanced Microstructures, Nanjing University, Nanjing 210093, China.

\*Corresponding author: baigx@cjlu.edu.cn (G Bai),

13a0505077@cjlu.edu.cn (Z Xiao)

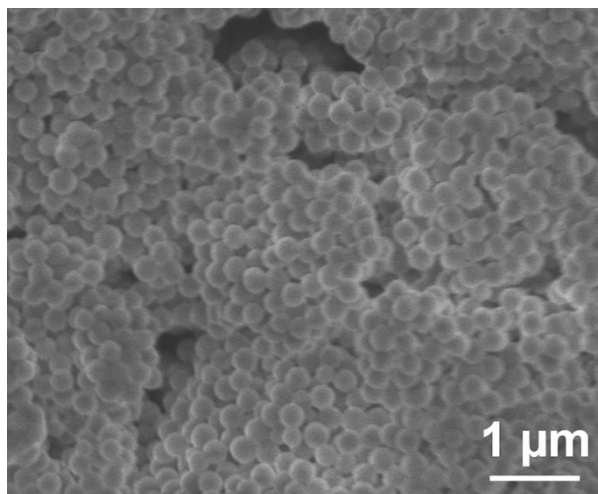

**Figure S1.** SEM images of the used PVDF nanopowders.

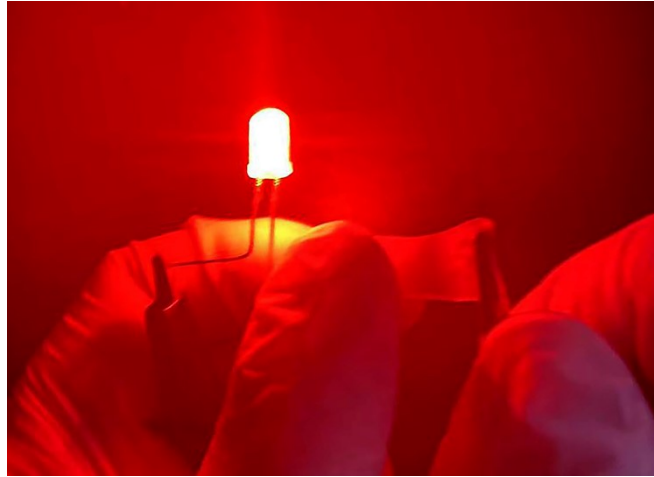

**Figure S2.** Hydrogel acts as a conductor to make the led circuit work properly.

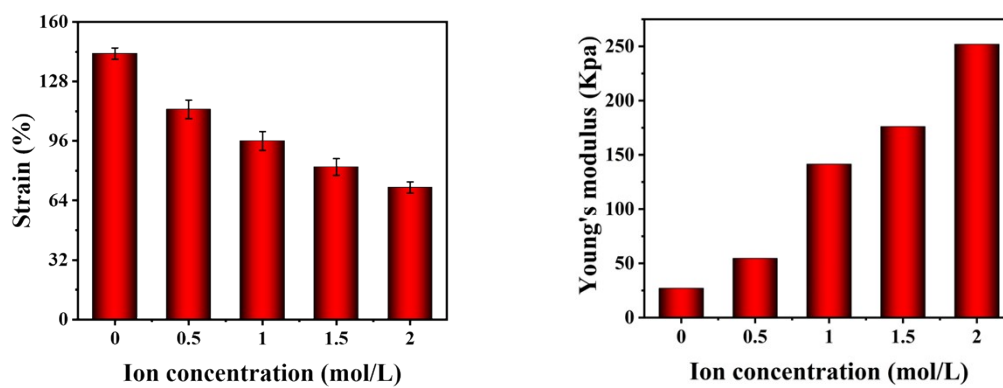

**Figure S3.** Tensile strain and Young's modulus of hydrogels treated with ionic solutions of different concentrations.

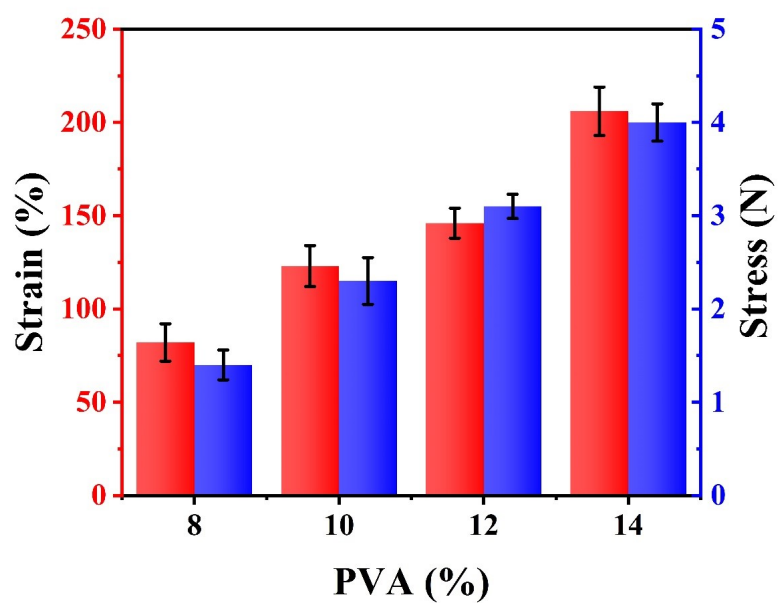

**Figure S4.** The effect of PVA concentration on the mechanical properties of hydrogels.

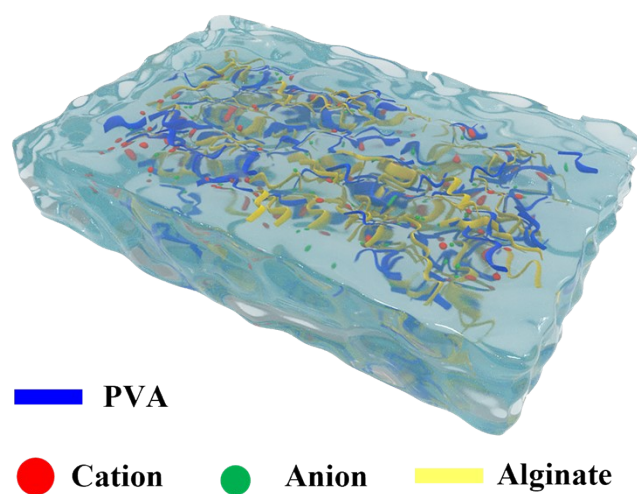

**Figure S5.** Hydrogel structure perspective diagram.

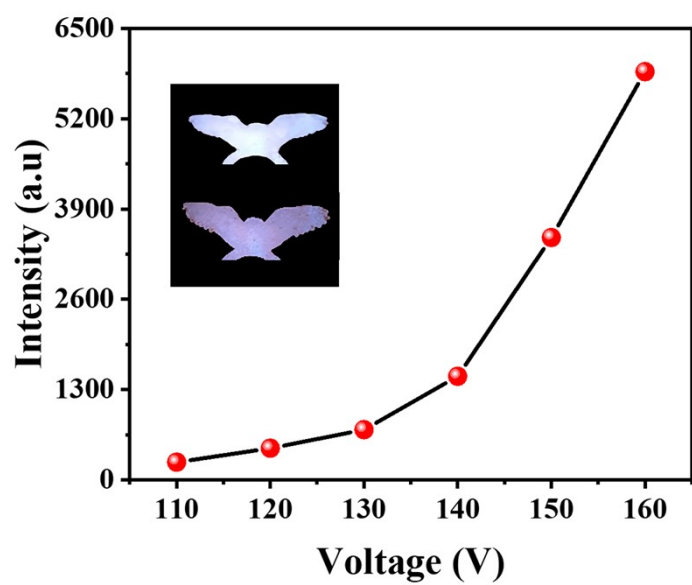

**Figure S6.** The luminescence intensity changes of ACEL devices and the luminance changes of real objects under different voltages.

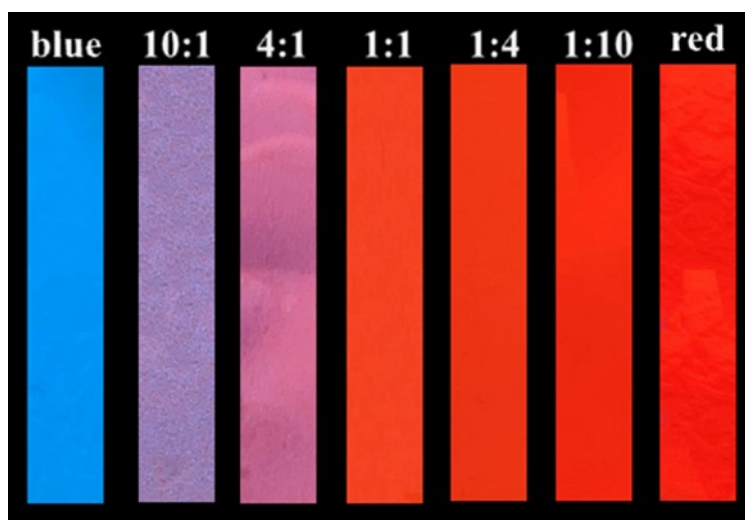

**Figure S7.** Color of phosphor emission layers in different proportions under 365 nm excitation.



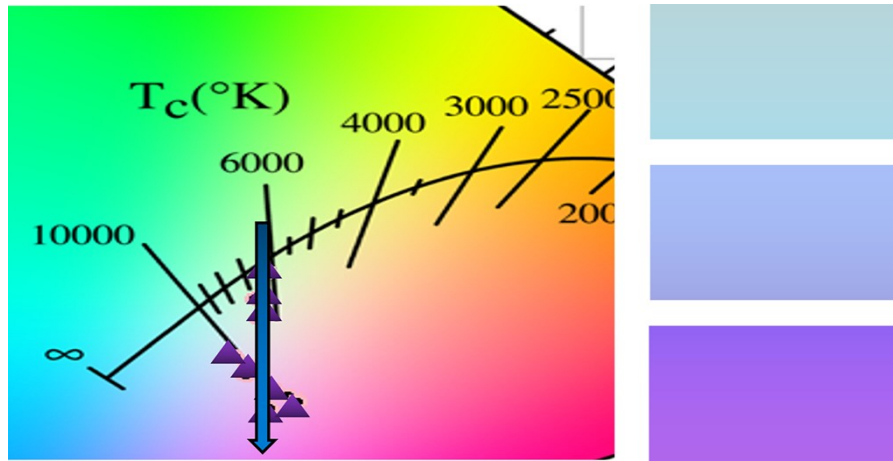

**Figure S8.** The color changes of ACCEL devices and real objects under the action of different voltage frequencies.
